# Supplementary material for: Evaluation of Anticancer Activity of Zhubech, a New 5-FU Analog Liposomal Formulation, against Pancreatic Cancer
Source: MDPI journal article supplement (doi:10.3390/ijms24054288), 2023-02-21
Supplement: s1 [file s1]

Supplementary Figures

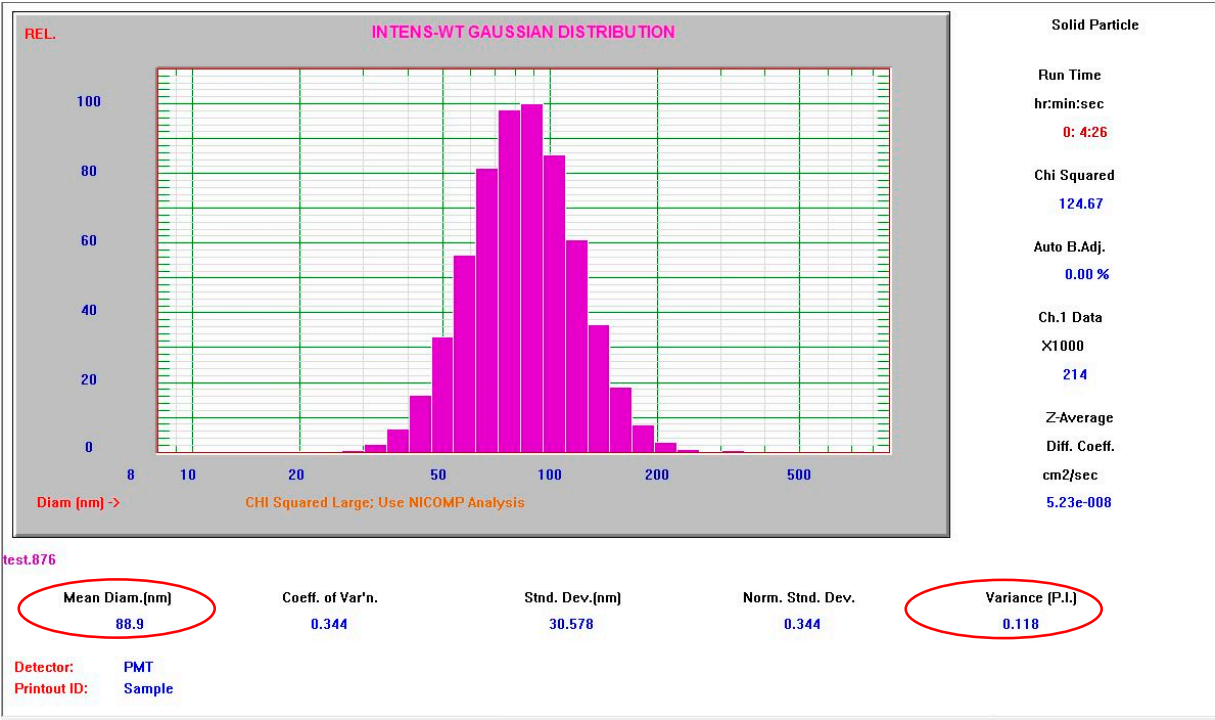

Figure S1: Blank Liposomal formulation (LnP) particle size and PDI (Variance) distributions

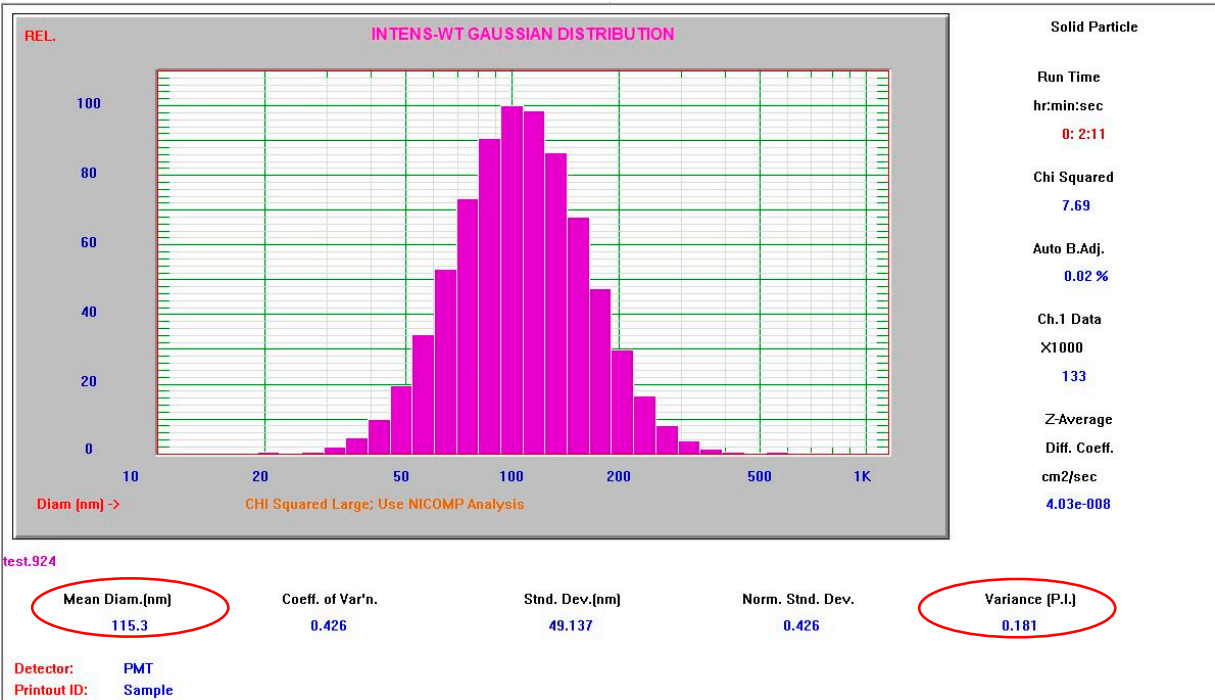

Figure S2: MFU-loaded Liposomal formulation (Zhubech) particle size and PDI distributions

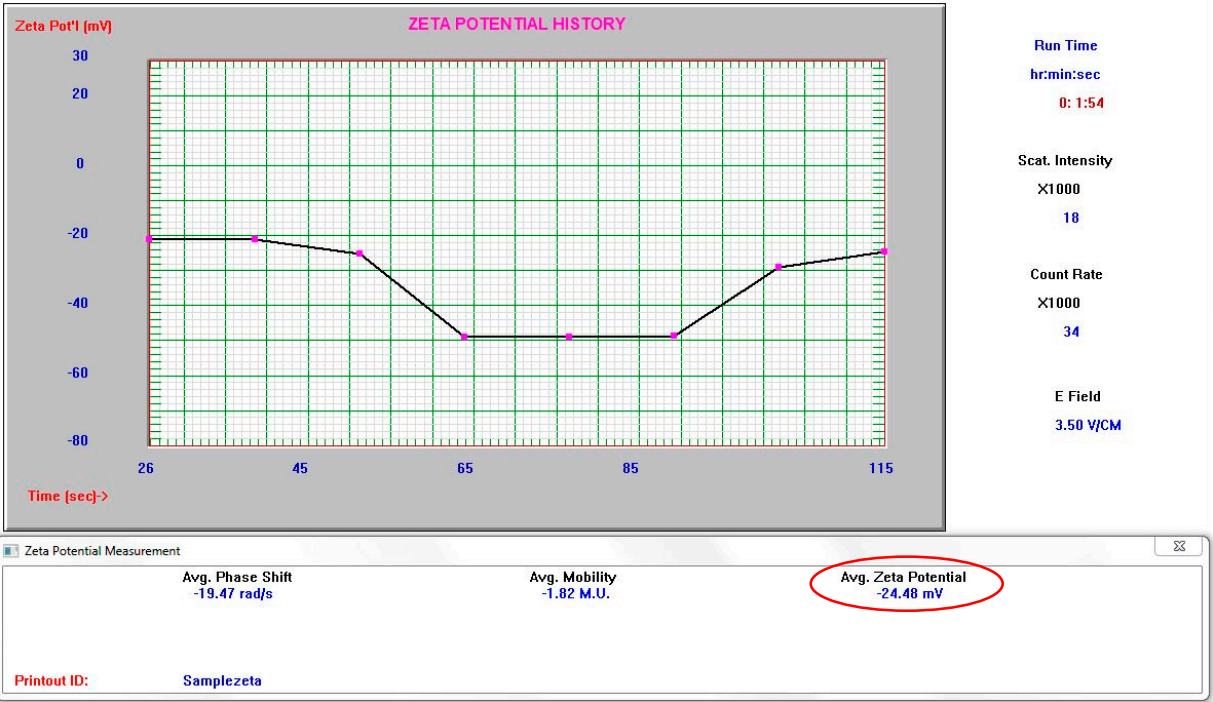

Figure S3: Zeta Potential of MFU-loaded (Zhubech) liposomal formulation]

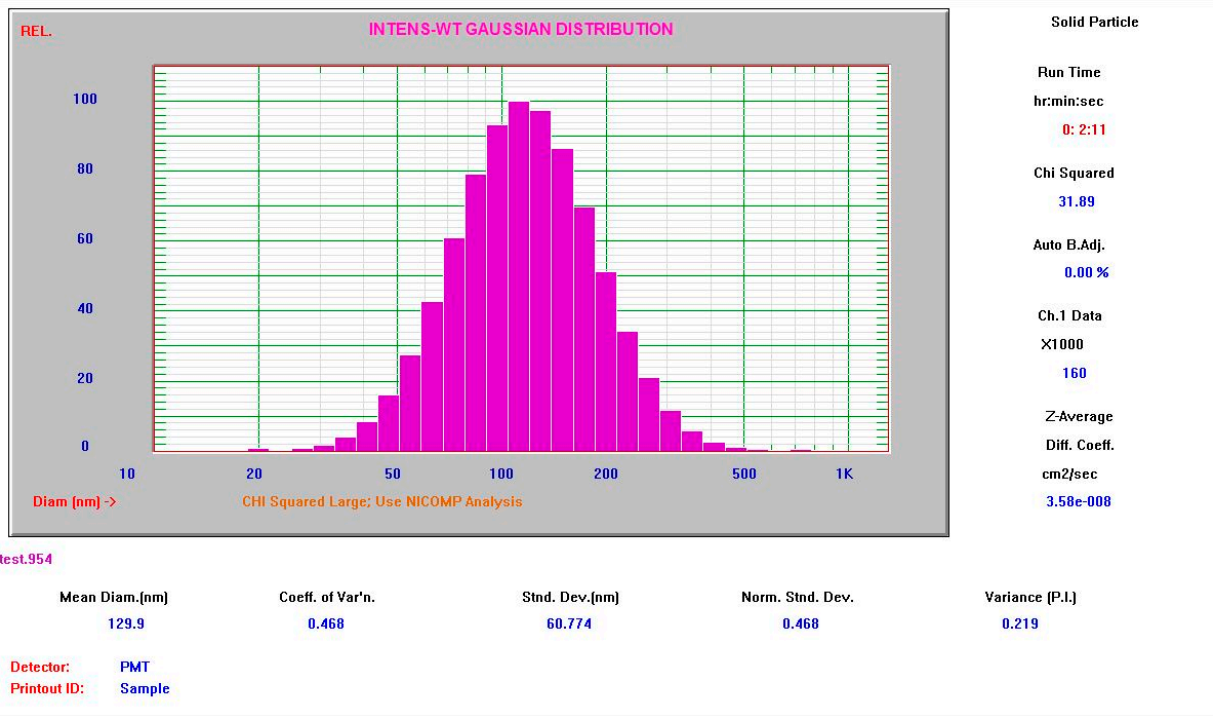

Figure S4: Particle size distribution and PDI of Zhubech at day 30 and at room temperature (25°C)

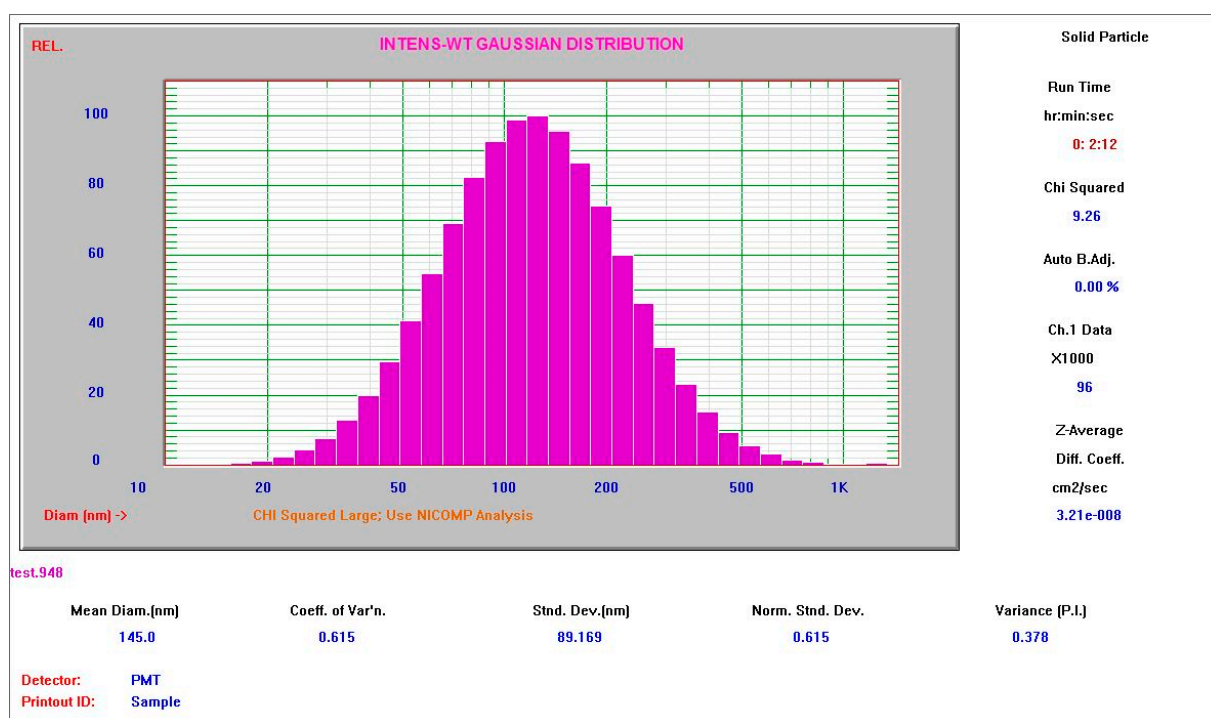

Figure S5: Particle size distribution and PDI of Zhubech at day 60 at room temperature (25°C)

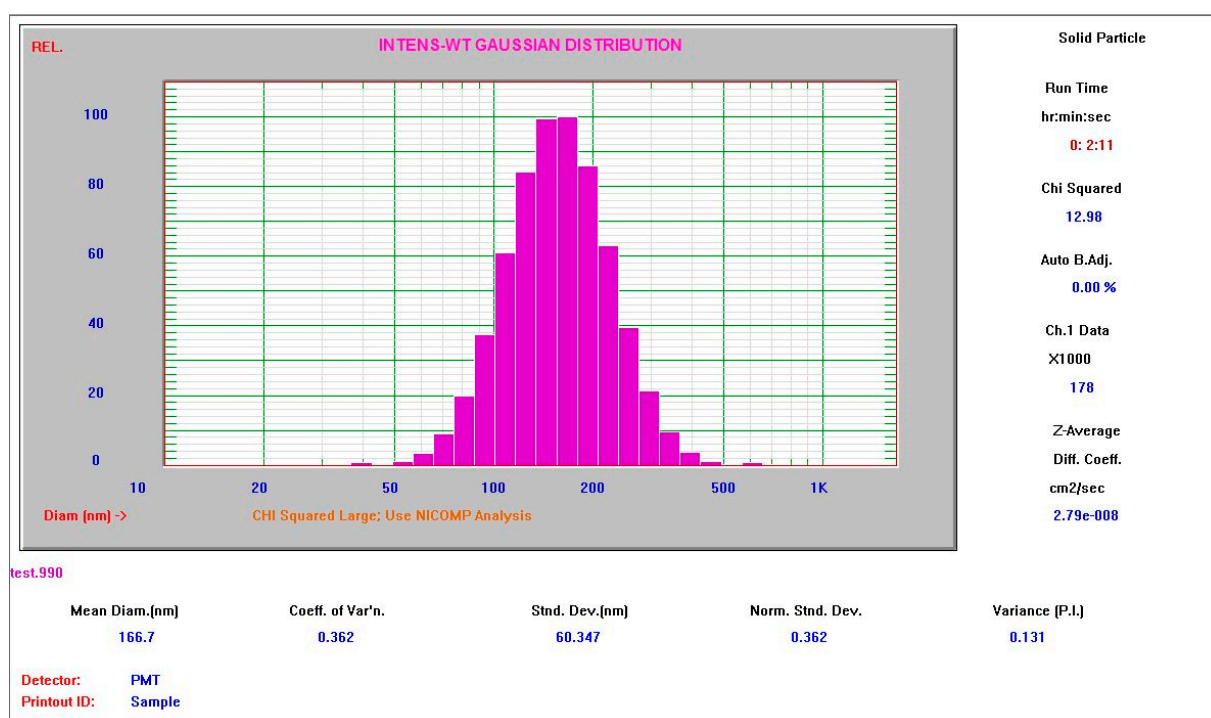

Figure S6: Particle size distribution and PDI of Zhubech at day 90 and at room temperature (25°C)

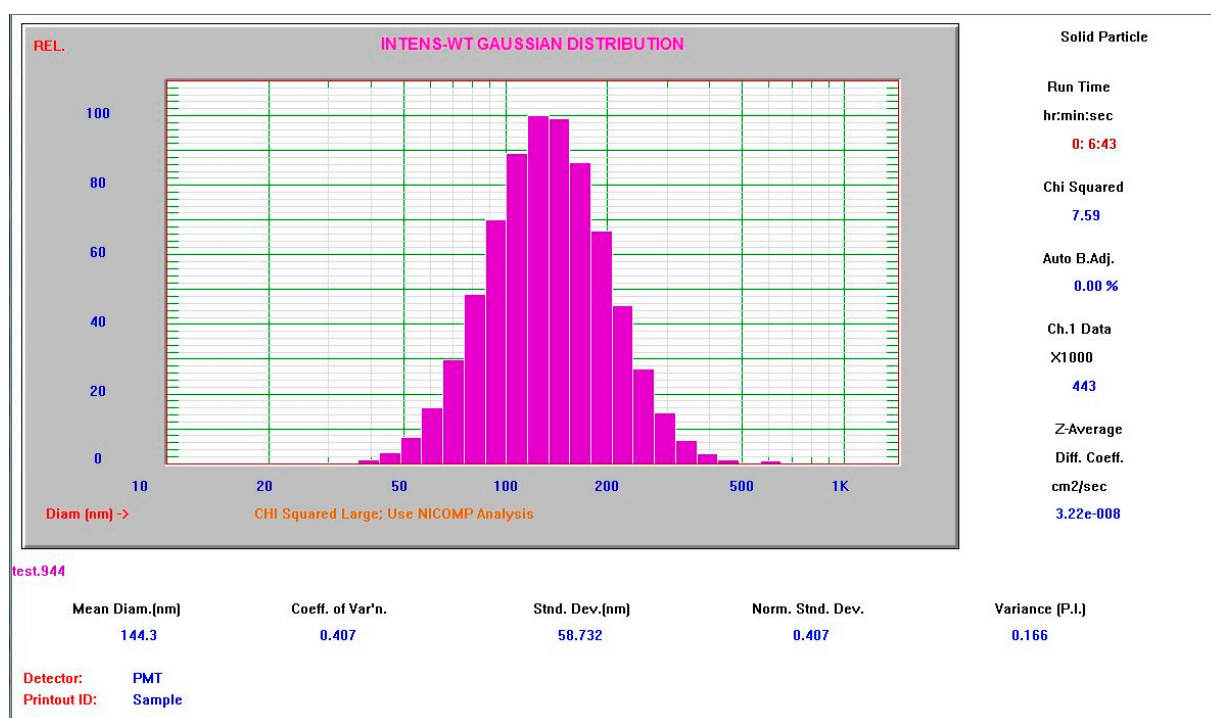

Figure S7: Particle size distribution and PDI of Gdhex-loaded liposomal formulation (Gdhex-LnP)

### Supplemental Video S1

Panc-1 cancer cells were grown in 6-well plates (with coverslips) at a cell density of  $2 \times 10^3$  for 24 h at 37 °C. The cells were then treated with Rhodamine-labeled LnP in growth media. After 12 and 24 h, Rhodamine-LnP was removed, and the cells were gently washed twice with PBS. Next, 5 µg/ml of DAPI dye was added for nuclear staining; the cells were fixed using 4% paraformaldehyde, then mounted and imaged using Leica SP2 Multiphoton system (confocal microscope). The video taken further demonstrates the orientation of the dye-loaded nanoparticles in a 3D style showing the colocalization of the rhodamine-liposomal formulation in the cytoplasm. The accumulation of labeled liposomes in perinuclear vesicles suggests the accumulation of formulation in the endosomal/lysosomal compartment in a time-dependent manner.
